# Supplementary material for: Olympic Cycle Comparison of the Nutritional and Cardiovascular Health Status of an Elite-Level Female Swimmer: Case Study Report from Slovenia
Source: MDPI journal article supplement (doi:10.3390/sports10050063), 2022-04-20
Supplement: s1 [file s1]

Table S1. The athlete's segmental LST.

| Parameter          | Year 2018 | Year 2022   |
|--------------------|-----------|-------------|
| LST segmental (kg) |           |             |
| LST left arm       | 2.55      | <b>2.78</b> |
| LST right arm      | 2.40      | <b>2.91</b> |
| LST trunk          | 22.4      | <b>24.8</b> |
| LST left leg       | 7.45      | <b>8.36</b> |
| LST right leg      | 7.29      | 7.74        |
| LST head           | 2.85      | 3.04        |

Significant change in value is written bold (i.e.,  $\geq 9\%$  of relative change). LST: lean soft tissue.
